# Supplementary material for: Stabilized Palladium Nanoparticles from Bis-(N-benzoylthiourea) Derived-PdII Complexes as Efficient Catalysts for Sustainable Cross-Coupling Reactions in Water
Source: MDPI journal article supplement (doi:10.3390/molecules29051138), 2024-03-04

# Stabilized Palladium Nanoparticles from Bis-(*N*-benzoylthiourea) Derived-Pd<sup>II</sup> Complexes as Efficient Catalysts for Sustainable Cross-Coupling Reactions in Water

Samet Poyraz <sup>1</sup>, H. Ali Döndaş <sup>1,2,\*</sup>, Samet Belveren <sup>1</sup>, Senanur Taş <sup>2</sup>, Raquel Hidalgo-León <sup>3</sup>, José Trujillo-Sierra <sup>3</sup>, Lesly V. Rodríguez-Flórez <sup>3</sup>, M<sup>a</sup> de Gracia Retamosa <sup>3</sup>, Ana Sirvent <sup>3</sup>, Mohammad Gholinejad <sup>4,5</sup>, Sara Sobhani <sup>6</sup> and José M. Sansano <sup>3,\*</sup>

<sup>1</sup> Department of Basic Pharmaceutical Sciences, Faculty of Pharmacy, Çukurova University, Balcalı, Adana 01330, Türkiye

<sup>2</sup> Department of Biotechnology, Institute of Natural and Applied Sciences, Çukurova University, Balcalı, Adana 01330, Türkiye

<sup>3</sup> Departamento de Química Orgánica, Instituto de Síntesis Orgánica (ISO), Centro de Innovación en Química Avanzada (ORFEO-CINQA), University of Alicante, P.O. Box 99, Alicante 03690, Spain

<sup>4</sup> Department of Chemistry, Institute for Advanced Studies in Basic Sciences (IASBS), P.O. Box 45195-1159, Zanzan 45137-66731, Iran

<sup>5</sup> Research Center for Basic Sciences & Modern Technologies (RBST), Institute for Advanced Studies in Basic Sciences (IASBS), Zanzan 45137-66731, Iran

<sup>6</sup> Department of Chemistry, College of Sciences, Shiraz University, Shiraz 71454, Iran

\* Correspondence: adondas@cu.edu.tr (H.A.D.); jmsansano@ua.es (J.M.S.)

## Complex 2

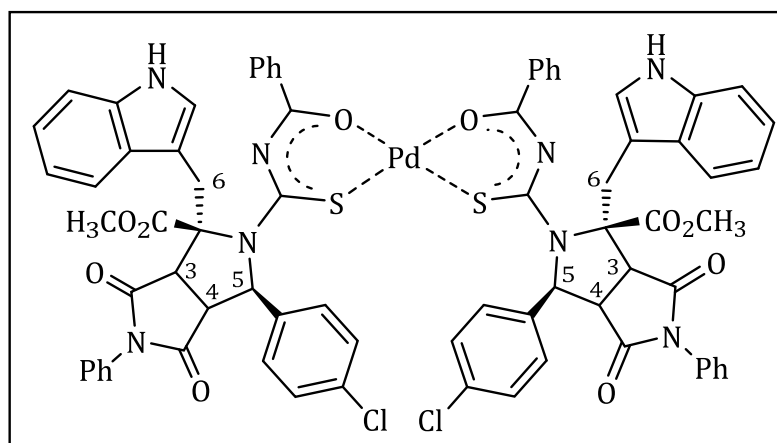

Brownish-yellow solid, 123 mg, 90% yield; mp 253–255 °C (MeOH, decomp.); IR (cm<sup>-1</sup>)  $\nu_{\text{max}}$ : 3417, 3060, 2952, 1790, 1716, 1495, 1391, 1258, 1201, 1168, 1093, 743.  $\delta_{\text{H}}$  (400 MHz, CDCl<sub>3</sub>): 8.39 (s, 2H, N-H), 8.20 (d, 4H, *J* = 7.3 Hz, Ar-H), 7.73 (d, 2H, *J* = 7.8 Hz, Ar-H), 7.55 (d, 2H, *J* = 7.3 Hz, Ar-H), 7.51–7.36 (m, 9H, Ar-H), 7.32–7.26 (m, 9H, Ar-H), 7.19 (d, 4H, *J* = 7.7 Hz, Ar-H), 7.10 (d, 2H, *J* = 1.9 Hz, Ar-H), 6.52–6.45 (m, 4H, Ar-H), 5.40 (d, 2H, *J* = 11.0 Hz, 5-H), 4.52 (d, 2H, *J* = 15.10 Hz, 6-H),

3.95 (s, 6H, OCH<sub>3</sub>), 3.89 (d, 2H, *J* = 15.00 Hz, 6'-*H*), 3.84 (d, 2H, *J* = 9.5 Hz, 3-*H*), 2.60 (dd, 2H, *J* = 10.8 Hz, 9.1 Hz, 4-*H*).  $\delta_c$  (100 MHz, CDCl<sub>3</sub>): 172.66 (2xC=S), 172.63 (2xC=O), 172.25 (2xC=O), 172.00 (2xC=O), 169.67 (2xC=O), 136.02 (2C), 135.91 (2C), 135.83 (2C), 133.88 (2C), 132.59 (2C), 130.74 (2C), 130.12 (6C), 129.03 (6C), 128.74 (2C), 128.34 (6C), 127.75 (2C), 125.72 (6C), 124.33 (2C), 122.89 (2C), 120.78 (2C), 117.85 (2C), 111.96 (2C), 108.72 (2C), 68.90 (2C), 54.13 (2C), 53.15 (2C), 48.59 (2C), 31.77 (2C), 30.89 (2C). HRMS: calculated for C<sub>74</sub>H<sub>60</sub>Cl<sub>2</sub>N<sub>8</sub>O<sub>10</sub>PdS<sub>2</sub>: 1462.7717, found: 1462.7711. EA calculated for C<sub>74</sub>H<sub>60</sub>Cl<sub>2</sub>N<sub>8</sub>O<sub>10</sub>PdS<sub>2</sub>: C 60.8, H 4.1, N 7.7, S 4.4 %; found: C 60.5, H 4.4, N 7.7, S 4.5 %

### <sup>1</sup>H NMR spectra of complex 2

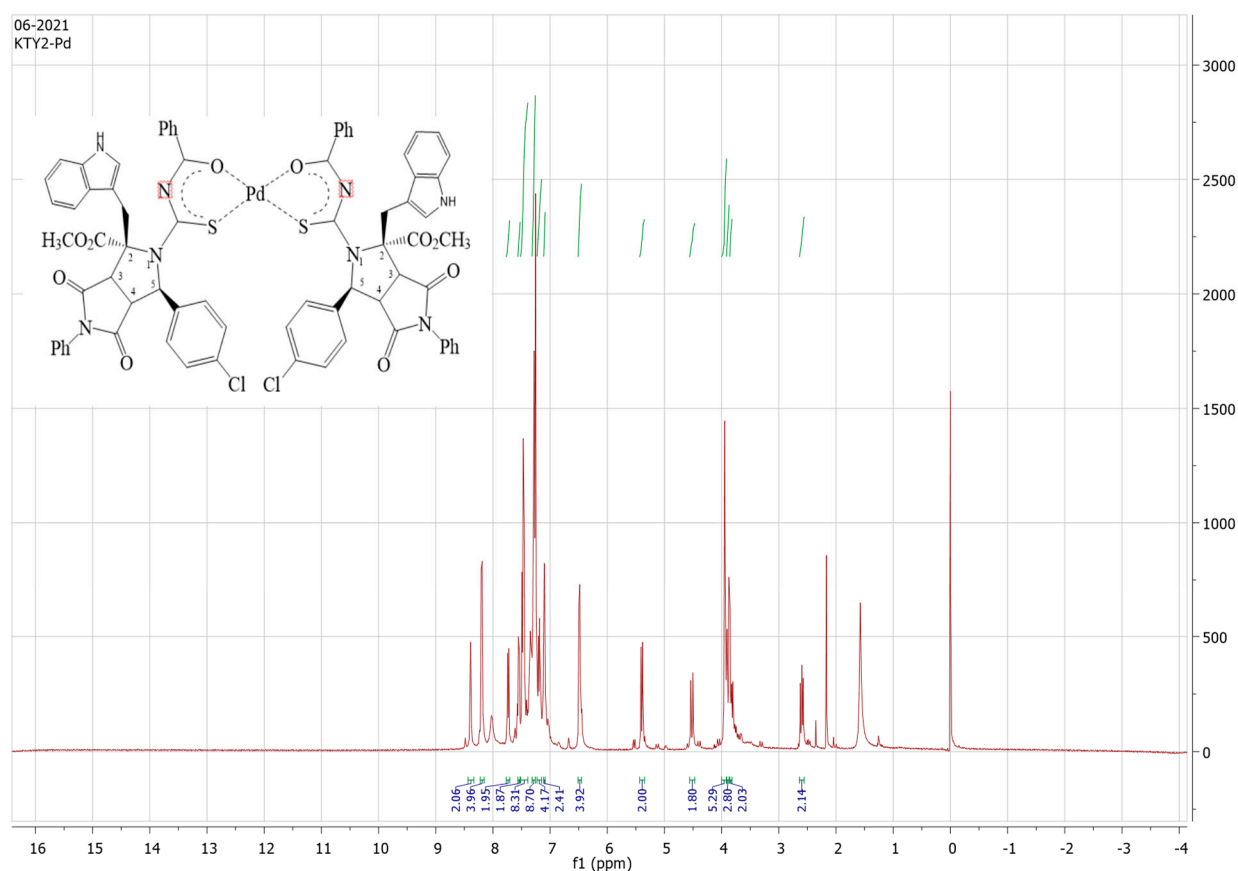

### <sup>13</sup>C-NMR spectra of complex 2

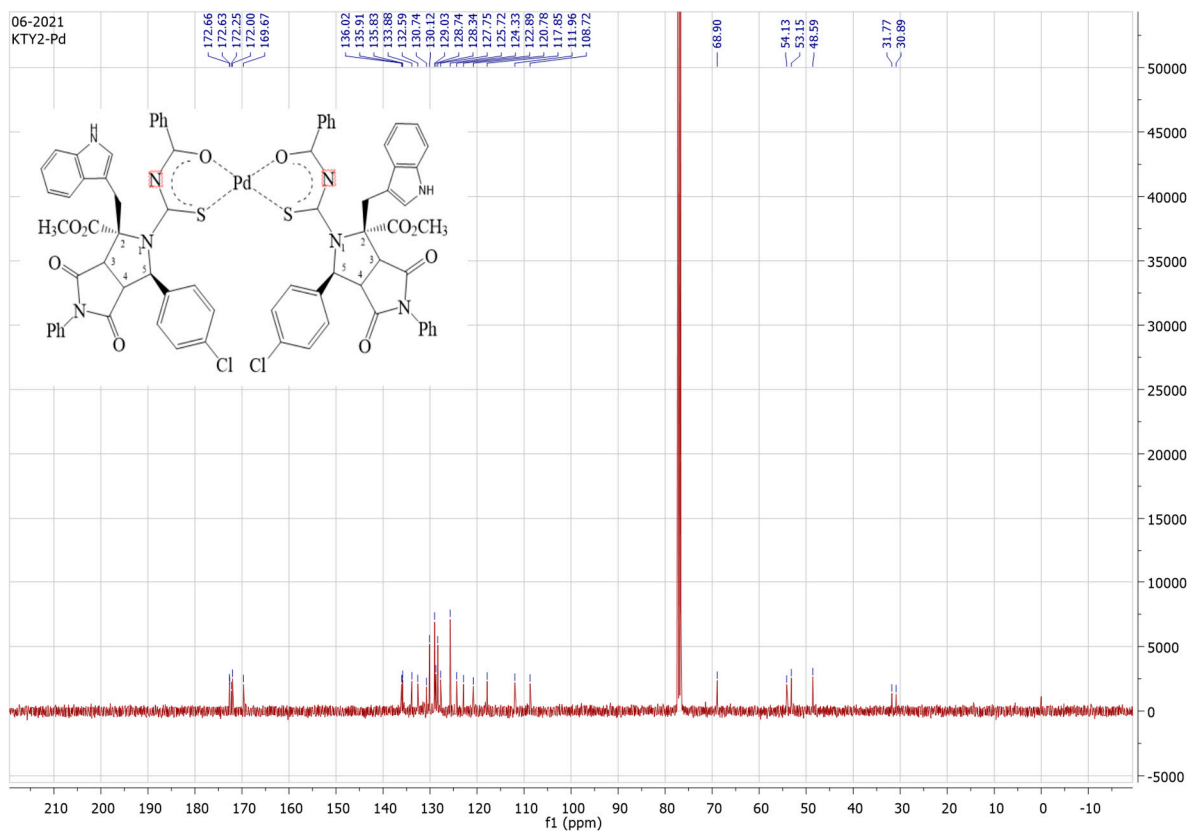

Supplement: s1 [file s1]
